# Supplementary material for: BVOC emissions from English oak ( Quercus robur ) and European beech ( Fagus sylvatica ) along a latitudinalgradient
Source: Copernicus journal article supplement (doi:10.5194/bg-13-6067-2016), 2016-11-04
Supplement: Supplementary file 1 [file Figure_2.xlsx]

## Sheet: Ljubljana
Date	Average temperature (°C)	Minimum temperature (°C)	Maximum temperature (°C)	Precipitation (mm)
2016-05-12	12.9	5	21	30.8
2016-05-13	8.5	7.2	13	9
2016-05-14	13	6.1	19.3	9.3
2016-05-15	14.5	10.4	17.5	0
2016-05-16	13.7	13	16.9	0
2016-05-17	14.1	9.4	19.8	0
2016-05-18	14.8	11.7	18.5	1.2
2016-05-19	16.7	10	22.5	1
2016-05-20	18	12	24	0
2016-05-21	19.5	10.2	26	0
2016-05-22	21.2	12.3	28.3	0
2016-05-23	20.8	14.3	27	0
2016-05-24	20.7	14.2	27.5	0.1
2016-05-25	21.4	12.5	27.7	0
2016-05-26	16	14.2	18.1	0
2016-05-27	19.6	17.7	25.3	9.5
2016-05-28	17.3	13.8	21.8	0
2016-05-29	19.1	13.4	25	11
2016-05-30	15.8	13.3	18	7.6
2016-05-31	20.9	13.7	23.5	0.3

## Sheet: Grafrath
Date	Average temperature (°C)	Minimum temperature (°C)	Maximum temperature (°C)	Precipitation (mm)
2016-05-19	14.5	4.4	22.2	0
2016-05-20	16.3	7.4	23.4	0
2016-05-21	18.1	7.7	25.6	0
2016-05-22	20.9	13.3	28.3	0
2016-05-23	13.2	9.3	16.7	0
2016-05-24	12.6	6.9	18.3	0
2016-05-25	15.6	6.4	22.1	0
2016-05-26	14.9	11.3	19.9	0
2016-05-27	12.3	11.2	14.3	5.6
2016-05-28	12	10.3	15.4	0.5
2016-05-29	12	8	15.9	6.9
2016-05-30	7.2	2	10	5.9
2016-05-31	10.1	0.6	17.4	0
2016-06-01	11.7	4.1	18.7	0
2016-06-02	16.5	10.2	22.7	1.1
2016-06-03	18.5	12.1	25	0
2016-06-04	20.5	15	27	4.6
2016-06-05	18.1	15	24.6	0
2016-06-06	26.7	22.1	32.7	0
2016-06-07	30.2	23.6	38.4	0
2016-06-08	30.2	25.6	36.7	0
2016-06-09	33.1	25	38.7	0
2016-06-10	31.9	26	37.4	0
2016-06-11	28.6	24.5	33.7	0
2016-06-12	27.3	24.2	32.4	0
2016-06-13	23.1	19.9	28.4	0
2016-06-14	19.7	16.1	26.6	0
2016-06-15	18.3	15	20.3	0
2016-06-16	21.3	18	25.9	0

## Sheet: Taastrup
Date	Average temperature (°C)	Minimum temperature (°C)	Maximum temperature (°C)	Precipitation (mm)
2016-07-01	14.9	4.2	3.5	0
2016-07-02	14.6	4.7	3.6	0
2016-07-03	16.2	4.4	3.4	0
2016-07-04	19.2	4.6	4	2.6
2016-07-05	20.1	3.7	4.5	0
2016-07-06	20.8	4.1	3	0
2016-07-07	19.5	2.7	2.3	71.6
2016-07-08	21.6	5.2	5	0
2016-07-09	24	4.7	4	10.8
2016-07-10	23.7	4.6	4.1	0
2016-07-11	20.4	5.3	4.2	0
2016-07-12	17.3	4.6	3.6	7.4
2016-07-13	15.1	1.7	1.2	18.2
2016-07-14	17	1.7	2.2	75.2
2016-07-15	19.4	1.7	1.6	0
2016-07-16	19.8	2.9	2	0
2016-07-17	21.2	2.7	1.7	0
2016-07-18	23.1	3.2	1.1	0
2016-07-19	23.3	2.6	1.7	0
2016-07-20	24.1	2.7	1.6	0
2016-07-21	23.6	2.6	2.4	0
2016-07-22	25.5	3.7	2.2	0
2016-07-23	24.9	3.1	2.1	0
2016-07-24	25	3.2	2.1	0
2016-07-25	26.2	3.7	3.9	0
