# Supplementary material for: BVOC emissions from English oak ( Quercus robur ) and European beech ( Fagus sylvatica ) along a latitudinalgradient
Source: Copernicus journal article supplement (doi:10.5194/bg-13-6067-2016), 2016-11-04
Supplement: Supplementary file 2 [file Figure_3_4.xlsx]

## Sheet: Oak
	Ljubljana oak 1			Grafrath oak 1			Grafrath oak 2			Taastrup oak 1			Taastrup oak 2
	A/Ci curve 1			A/Ci curve 1			A/Ci curve 1			A/Ci curve 1			A/Ci curve 1
	A	Ci		A	Ci		A	Ci		A	Ci		A	Ci
	0.564	400		0.897	400		7.91	400		5.83	400		4.07	400
	0.334	300		0.44	300		5.38	300		4.28	300		2.8	300
	0.123	200		0.12	200		2.53	200		2.41	200		1.2	200
	-0.644	100		-0.124	100		0.0605	100		0.946	100		0.231	100
	-0.67	50		-0.561	50		-1.11	50		0.0771	50		-0.188	50
	0.126	400		0.902	400		7.9	400		5.86	400		4.39	400
	0.0836	400		0.888	400		8.18	400		5.92	400		4.7	400
	0.384	600		2.44	600		12.8	600		8.75	600		6.12	600
	0.726	800		2.83	800		15.5	800		11	800		8.1	800
	1.15	1000					16.8	1000		12.2	1000		9.98	1000
	A/Ci curve 2			A/Ci curve 2			A/Ci curve 2			A/Ci curve 2			A/Ci curve 2
	A	Ci		A	Ci		A	Ci		A	Ci		A	Ci
	0.831	400		2	400		20.1	400		8.9	400		1.23	400
	0.796	300		1.26	300		18.6	300		6.31	300		0.266	300
	0.714	200		0.604	200		16.9	200		4.09	200		-0.411	200
	0.368	100		0.232	100		14.8	100		1.58	100		-1.09	100
	0.0903	50		-0.413	50		13.7	50		0.473	50		-1.37	50
	0.267	400		2.54	400		20.7	400		8.59	400		1.14	400
	0.291	400		2.32	400		19	400		8.86	400		1.22	400
	0.397	600		3.58	600		23.3	600		12.5	600		2.45	600
	0.46	800		5.07	800		22.2	800		14.3	800		3.64	800
	0.483	1000					18.4	1000		16.1	1000		4.08	1000
				A/Ci curve 3			A/Ci curve 3			A/Ci curve 3			A/Ci curve 3
				A	Ci		A	Ci		A	Ci		A	Ci
				0.68	400		4.62	400		5.48	400		6.48	400
				0.221	300		4.5	300		3.56	300		4.36	300
				0.132	200		2.74	200		1.81	200		2.37	200
				-0.994	100		0.259	100		-0.0599	100		0.461	100
				-1.11	50		-1.05	50		-0.98	50		-0.605	50
				1.2	400		7.85	400		5.41	400		6.1	400
				1.09	400		4.96	400		5.5	400		6.7	400
				1.96	600		12.2	600		8.02	600		10.5	600
				1.71	800		15.3	800		9.45	800		13.7	800
				1.13	1000		15.8	1000		10.4	1000		13.9	1000
							A/Ci curve 4			A/Ci curve 4			A/Ci curve 4
							A	Ci		A	Ci		A	Ci
							8.27	400		6.37	400		5.04	400
							5.78	300		4.8	300		3.41	300
							3.67	200		2.72	200		1.87	200
							0.529	100		0.756	100		0.334	100
							-0.905	50		-0.142	50		-0.441	50
							9.47	400		6.56	400		5.2	400
							9.97	400		6.76	400		5.31	400
							12.7	600		9.44	600		8.48	600
							14.6	800		10.9	800		10.5	800
							13.6	1000		11.3	1000

## Sheet: Beech
	Ljubljana beech 1			Grafrath beech 1			Grafrath beech 2			Taastrup beech 1
	A/Ci curve 1			A/Ci curve 1			A/Ci curve 1			A/Ci curve 1
	A	Ci		A	Ci		A	Ci		A	Ci
	6.84	400.33		5.36	401.3		4.24	399.73		0.752	399.8
	5.01	299.59		3.2	302.55		2.69	299.83		0.26	299.98
	7.48	199.9		1.94	199.99		1.56	200.34		-0.101	199.62
	-0.949	98.47		0.506	100.24		1.95	94.06		-0.492	100.31
	-0.508	50.25		-0.278	49.27		0.5	46.18		-0.531	50.18
	7.03	401.09		5.86	392.83		5.15	400.74		0.624	400.45
	6.96	400.18		5.76	400.08		5.06	392.75		0.778	400.44
	8.55	600.88		21.1	602.7		17.1	600.14		1.44	600.16
	9.02	800.24		19.4	800.1		23.9	799.66		2.03	799.27
	7.14	999.65		18.7	999.52		22	1000.21		2.47	1000.53
	A/Ci curve 2			A/Ci curve 2			A/Ci curve 2			A/Ci curve 2
	A	Ci		A	Ci		A	Ci		A	Ci
	7.44	400.49		4.17	399.69		3.56	399.62		2.51	399.97
	5.53	300.44		2.95	298.76		2.16	299.92		1.47	299.5
	3.35	199.7		1.61	199.59		10.6	200.13		0.602	198.58
	1.04	99.22		-0.112	99.41		9.86	99.82		-0.329	99.91
	-0.196	50.02		-0.107	49.13		-1.27	49.65		-0.828	49.15
	7.24	399.6		5.21	400.3		4.35	400.67		2.6	400.57
	7.18	399.49		6.3	400.31		6.08	399.73		2.59	399.81
	9.08	600.59		7.08	600.67		6.7	600.03		4.47	600.24
	9.7	799.84		8.21	800.2		23	809.04		6.07	799.96
	12	1000.69		7.86	1000.25		20.8	1000.83		7.12	999.62
				A/Ci curve 3			A/Ci curve 3			A/Ci curve 3
				A	Ci		A	Ci		A	Ci
				2.68	399.84		3.92	401.17		3.77	399.54
				1.57	299.79		2.68	301.4		2.49	300.2
				0.465	199.93		1.47	200.59		1.76	200.07
				-0.565	101.01		0.081	101.57		0.42	98.85
				-1.13	49.97		1.44	49.81		-0.342	50.13
				4.57	401.3		5.93	398.87		4.42	400.03
				3.15	400.4		4.6	401.25		4.39	400.05
				4.82	600.93		4.23	598.68		6.58	599.66
				6.57	799.36		7.09	800.59		8.06	800.44
				5.89	1000.06		7.3	1000.18		8.05	999.71
				A/Ci curve 4			A/Ci curve 4			A/Ci curve 4
				A	Ci		A	Ci		A	Ci
				3.41	399.46		6.33	399.84		2.71	399.99
				2.02	299.33		4.08	300.44		1.72	299.73
				1.23	201.27		2.07	200.18		0.893	199.62
				0.0492	99.25		0.145	98.94		0.0476	99.36
				-0.516	49.32		-0.898	48.85		-0.199	49.91
				4.07	401.18		6.62	423.07		3.1	400.54
				4.05	400.29		6.77	399.87		3.09	399.47
				5.67	600.96		8.68	599.47		4.91	599.63
				7.02	800.21		10.6	800.37		6.18	801.34
				7.43	1000.12		10.9	1000.83		6.59	1000.63
				A/Ci curve 5			A/Ci curve 5			A/Ci curve 5
				A	Ci		A	Ci		A	Ci
				7.54	399.11		3.38	400.26		2.65	400.03
				5.23	300.21		2.12	300.42		1.72	300.02
				3.1	199.72		0.807	200.16		1.06	199.83
				1.04	100.05		-0.346	99.81		0.146	99.12
				-0.137	50.01		-1.11	48.47		-0.251	48.6
				8.2	400.11		3.43	400.68		3.26	400.58
				8.17	400.07		3.53	399.59		3	399.7
				11.6	599.97		5.45	600.29		4.58	599.82
				13.1	800.12		6.31	799.99		5.43	800.1
				13.5	1000.04		5.93	1000.29		5.04	999.64
				A/Ci curve 6			A/Ci curve 6
				A	Ci		A	Ci
				6.99	400.06		3.63	400.42
				4.85	300.08		2.44	299.88
				2.65	199.74		1.19	200.46
				0.0274	98.82		0.00446	100.01
				-0.847	49.27		-0.606	49.35
				7.64	406.6		3.58	407.48
				7.74	399.8		3.44	393.42
				10.7	599.49		5.63	600.37
				11.3	800.11		6.89	800.09
				11.8	1000.82		6.96	1000.99
							A/Ci curve 7
							A	Ci
							1.37	400.16
							0.724	299.71
							0.23	200.56
							-0.398	99.67
							-0.719	48
							1.11	400.64
							1.53	399.84
							2.25	600.02
							3.18	800.53
							3.33	1000.16
							A/Ci curve 8
							A	Ci
							2.72	400.05
							1.74	299.94
							0.99	199.63
							0.0229	100.32
							-0.333	50.14
							2.65	464.21
							2.44	400.34
							4.08	599.99
							5.34	799.92
							5.98	1000.57
