# Supplementary material for: BVOC emissions from English oak ( Quercus robur ) and European beech ( Fagus sylvatica ) along a latitudinalgradient
Source: Copernicus journal article supplement (doi:10.5194/bg-13-6067-2016), 2016-11-04
Supplement: Supplementary file 3 [file Figure_5_6.xlsx]

## Sheet: Oak
Ljubljana						Grafrath									Taastrup
Tree 1	Isoprene	α-Pinene	3-Carene	D-Limonene		Tree 1	Isoprene	tricyclene	α-Pinene	Camphene	3-Carene	D-Limonene	b-ocimene		Tree 1	Isoprene	α-Pinene	Camphene	3-Carene	D-Limonene	b-ocimene	α-Farnesene
Leaf 1	1.37038	0.0167659	0.0313504	0.0382188		Leaf 1	4.98386		0.0829356	0.0555425	0.0810059	0.08967			Leaf 1	2.75913	0.0253797	0.0360486	0.0242947	0.101266
Leaf 2	0.217473	0.0125166	0.0254446	0.0259395		Leaf 2	3.26313		0.0975617	0.0704325	0.172909	0.195376			Leaf 2	1.05556			0.0211191	0.119362	0.0480825
Leaf 3	0.0678927	0.0131087	0.0301257	0.0336513		Leaf 3	5.75065		0.120193	0.0803578	0.174451	0.276081			Leaf 3	3.20117	0.0187316		0.0158285	0.0874018
Leaf 4	0.293879	0.0275189	0.054142	0.0510834		Leaf 4	6.6501		0.0623264		0.108992	0.118405			Leaf 4	1.47251	0.0143096	0.0225453	0.0128313	0.0775224	0.0396846
Leaf 5	0.228836	0.0318735	0.0581609	0.0651482		Leaf 5	2.55607		0.0850222	0.0498968	0.161258	0.217297	0.0628473		Leaf 5	1.0015	0.0107477		0.0148432	0.0474837	0.298263	0.0770519
Leaf 6	0.0351478	0.0137186	0.0237716	0.0262877		Leaf 6	7.45678		0.104747	0.0669119	0.206551	0.302931			Leaf 6	1.82005	0.00686339		0.0102972	0.0325942	0.0146285
Leaf 7	0.304334	0.026794	0.0519595	0.0520589											Leaf 7	2.8016	0.00631789		0.00994168	0.0276754	0.0136181
						Tree 2									Leaf 8	2.23874
						Leaf 1	10.669		0.153929		0.136191	0.139786
						Leaf 2	5.94428		0.0702742	0.0867255	0.105929	0.157269			Tree 2
						Leaf 3	7.16744		0.0725834	0.0959962	0.11155	0.175912	0.053739		Leaf 1	2.55351	0.0097753		0.0114508	0.0399246
						Leaf 4	8.52766		0.0597049	0.0723257	0.0900578	0.121745			Leaf 2	2.42585	0.00943844		0.00923332	0.0285261
						Leaf 5	4.13128	0.0287842	0.106931	0.116059	0.136641	0.224707			Leaf 3	4.26042	0.0118821		0.0117804	0.0427935	0.0309027
						Leaf 6	2.5965		0.0552935	0.104197	0.123707	0.195232			Leaf 4	0.696608	0.0222719	0.0348738	0.0164648	0.0674759	0.0460807
															Leaf 5	6.84567	0.0234539		0.0197121	0.070092
															Leaf 6	6.502	0.0215429		0.0160053	0.058087
															Leaf 7	5.0625	0.0149561		0.0127559	0.0460587	0.0132142
															Leaf 8	3.43074	0.0252683	0.0428121	0.0206006	0.0580217
															Leaf 9	2.82942	0.0271243		0.0179184	0.051249	0.0260813

## Sheet: Beech
Ljubljana										Grafrath														Taastrup
Tree 1	α-Thujene	α-Pinene	Sabinene	3-Carene	α-Terpinene	Limonene	β-Phellandrene	γ-Terpinene		Tree 1	α-Thujene	α-Pinene	Camphene	Sabinene	β-Pinene	α-Phellandrene	3-Carene	α-Terpinene	Limonene	β-Phellandrene	γ-Terpinene	Terpinolene		Tree 1	α-Pinene	Camphene	Sabinene	3-Carene	Limonene	Eucalyptol
Leaf 1	0.078814	0.126503	0.556423	0.230818	0.0866731	0.239134	0.10708			Leaf 1							0.0773287		0.0876557					Leaf 1	0.0365062	0.0589173		0.0265624	0.10928
Leaf 2	0.0896775	0.126594	0.687828	0.225293	0.119769	0.220277		0.204585		Leaf 2		0.0558916					0.0892212		0.0861144					Leaf 2	0.0373412	0.0438637		0.0205922	0.112737
Leaf 3	0.0661003	0.0718537	0.419463	0.137085	0.0796769	0.150321		0.150493		Leaf 3	0.0416646	0.0421457		0.17946			0.0653074	0.04888	0.0757831	0.0464376	0.07621			Leaf 3	0.016867	0.0936595	0.0179561	0.0301149	0.12489
Leaf 4	0.055933	0.136328	0.362983	0.148121	0.0588209	0.171505	0.0619395			Leaf 4	0.102729	0.124786		0.241909			0.174707	0.081974	0.169562	0.107535	0.177427			Leaf 4	0.0705485	0.0848252		0.0377689	0.140846	0.0290575
Leaf 5	0.0494335	0.0670454	0.15794	0.125739		0.13007				Leaf 5	0.0493581	0.122891		0.108815			0.148354		0.14074	0.0587462	0.110125			Leaf 5	0.0303223		0.362213	0.0348267	0.134322
Leaf 6	0.0541007	0.0402088	0.134896	0.0711637	0.0462789	0.0765743		0.0788394		Leaf 6	0.093173	0.305808		0.246238	0.362654		0.140149	0.0956204	0.111118	0.0983679	0.206266			Leaf 6	0.0226399		0.433309	0.0235533	0.094452
Leaf 7	0.0321577	0.057212	0.102385	0.0572805	0.043712	0.0344211		0.0642336		Leaf 7	0.101434	0.100755		0.251272			0.11784	0.103333	0.127344	0.0892785	0.205661			Leaf 7	0.0214521		0.209255	0.0252312	0.0890829
										Leaf 8	0.0643589	0.0848882	0.0752365	0.452238			0.104776	0.0706472	0.126067	0.0510567	0.150155			Leaf 8	0.0386727		0.330292	0.0438555	0.121849
										Leaf 9	0.179819	0.0604026		0.765137		0.0393107	0.0756526	0.138449	0.117264	0.111251	0.294111	0.126719		Leaf 9	0.0435695		0.249425	0.0350832	0.119783
										Leaf 10	0.258214	0.0689352		0.877945		0.0648185	0.0798139	0.209131	0.126508	0.16848	0.42076	0.0761513		Leaf 10	0.0359669	0.0400864	0.528663	0.0272897	0.120068
										Leaf 11	0.252035	0.072242		0.878138		0.072631	0.0887548	0.211923	0.145099	0.159923	0.439859
										Leaf 12	0.154769	0.0712988		0.924718			0.0962172	0.123573	0.137961	0.0929458	0.265874	0.115803
										Leaf 13	0.157044	0.0873401		0.873842			0.0910975	0.144909	0.143102	0.106357	0.279661	0.119784
										Leaf 14	0.372934	0.112357		1.06534		0.0787658	0.0955197	0.271677	0.162503	0.201738	0.601356	0.192559
										Leaf 15	0.209891	0.0701592		0.635285		0.0551598	0.0695599	0.165312	0.101814	0.148432	0.352335	0.12576
										Tree 2
										Leaf 1		0.120017		0.155543			0.187956		0.181219
										Leaf 2	0.126278	0.0729503		0.31066			0.115505	0.0977847	0.127027	0.0991118	0.218558
										Leaf 3	0.12378	0.128085	0.124268	0.176854		0.0542562	0.160307	0.141146	0.171555	0.15159	0.237998
										Leaf 4	0.0579405	0.0844988		0.132439			0.111169	0.0713473	0.109013	0.0737923	0.131303
										Leaf 5		0.13847	0.162973	0.131192			0.200632		0.209667	0	0
										Leaf 6	0.0533834	0.431365	0.169577	0.538597			0.28559		0.251675	0.179043	0
										Leaf 7	0.101816	0.172891		0.583471			0.203498	0.0829648	0.243434	0.0971393	0
										Leaf 8	0.0610675	0.0916723	0.0908411	0.345005			0.13701	0.0823163	0.173038	0.0927767	0.173953
										Leaf 9	0.0624709	0.0867712		0.349952			0.0944107	0.0609411	0.11836	0.0638214	0.148037
										Leaf 10	0.16523	0.0985674		0.62162		0.0547644	0.0882806	0.136367	0.114385	0.116351	0.27937	0.117245
										Leaf 11	0.0299496	0.0714103		0.184525			0.0886176		0.0928089	0.047186	0
										Leaf 12		0.0689259					0.093304		0.134964	0	0
										Leaf 13		0.0604113		0.215131			0.100946		0.111027	0	0
										Leaf 14	0.0722502	0.0594724		0.272917			0.0890674	0.0708409	0.114803	0.0582295	0.169921
										Leaf 15	0.13952	0.0774635		0.729313			0.079244	0.123102	0.107941	0.0985312	0.228476	0.118166
										Leaf 16	0.187983	0.0937966		0.549436		0.0567602	0.078738	0.16067	0.0986874	0.135891	0.290808
										Leaf 17	0.279296	0.0901504		0.823083		0.0719893	0.0625247	0.20029	0.123081	0.184829	0.36865
