# Supplementary material for: BVOC emissions from English oak ( Quercus robur ) and European beech ( Fagus sylvatica ) along a latitudinalgradient
Source: Copernicus journal article supplement (doi:10.5194/bg-13-6067-2016), 2016-11-04
Supplement: Supplementary file 4 [file Figure_7_8.xlsx]

## Sheet: Oak
tree nr	ID	Geographical location	Age	Isoprene	α-Pinene	Camphene	3-Carene	Limonene	β-Ocimene	Temperature (°C)	PAR (µmol m¯² s¯¹)
Lj oak 1	L11	Ljubljana	42	1.37038	0.0167659	0	0.0313504	0.0382188	0	15.8	399
Lj oak 1	L12	Ljubljana	42	0.217473	0.0125166	0	0.0254446	0.0259395	0	18.8	786
Lj oak 1	L13	Ljubljana	42	0.0678927	0.0131087	0	0.0301257	0.0336513	0	20.1	511
Lj oak 1	L14	Ljubljana	42	0.293879	0.0275189	0	0.054142	0.0510834	0	16.3	336
Lj oak 1	L15	Ljubljana	42	0.228836	0.0318735	0	0.0581609	0.0651482	0	17.7	443
Lj oak 1	L16	Ljubljana	42	0.0351478	0.0137186	0	0.0237716	0.0262877	0	20.7	767
Lj oak 1	L17	Ljubljana	42	0.304334	0.026794	0	0.0519595	0.0520589	0	22	916
Gr oak 1	G11	Grafrath	5	4.98386	0.0829356	0.0555425	0.0810059	0.08967	0	25.372	893
Gr oak 1	G12	Grafrath	5	3.26313	0.0975617	0.0704325	0.172909	0.195376	0	29.245	918
Gr oak 1	G13	Grafrath	5	5.75065	0.120193	0.0803578	0.174451	0.276081	0	30.588	918
Gr oak 1	G14	Grafrath	5	6.6501	0.0623264	0	0.108992	0.118405	0	28.772	881
Gr oak 1	G15	Grafrath	5	2.55607	0.0850222	0.0498968	0.161258	0.217297	0.0628473	32.695	923
Gr oak 1	G16	Grafrath	5	7.45678	0.104747	0.0669119	0.206551	0.302931	0	33.289	902
Gr oak 2	G21	Grafrath	5	10.669	0.153929	0	0.136191	0.139786	0	32.026	783
Gr oak 2	G22	Grafrath	5	5.94428	0.0702742	0.0867255	0.105929	0.157269	0	35.464	905
Gr oak 2	G23	Grafrath	5	7.16744	0.0725834	0.0959962	0.11155	0.175912	0.053739	36.995	895
Gr oak 2	G24	Grafrath	5	8.52766	0.0597049	0.0723257	0.0900578	0.121745	0	30.329	872
Gr oak 2	G25	Grafrath	5	4.13128	0.106931	0.116059	0.136641	0.224707	0	33.739	904
Gr oak 2	G26	Grafrath	5	2.5965	0.0552935	0.104197	0.123707	0.195232	0	35.629	825
Ta oak 1	T11	Taastrup	43	2.75913	0.0253797	0.0360486	0.0242947	0.101266	0	19.1	147.3
Ta oak 1	T12	Taastrup	43	1.05556	0	0	0.0211191	0.119362	0.0480825	19.9	526.1
Ta oak 1	T13	Taastrup	43	3.20117	0.0187316	0	0.0158285	0.0874018	0	21.3	156.4
Ta oak 1	T14	Taastrup	43	1.47251	0.0143096	0.0225453	0.0128313	0.0775224	0.0396846	21.1	158.4
Ta oak 1	T15	Taastrup	43	1.0015	0.0107477	0	0.0148432	0.0474837	0.298263	18.7	240.4
Ta oak 1	T16	Taastrup	43	1.82005	0.00686339	0	0.0102972	0.0325942	0.0146285	19.4	214.9
Ta oak 1	T17	Taastrup	43	2.8016	0.00631789	0	0.00994168	0.0276754	0.0136181	19.9	92.7
Ta oak 1	T18	Taastrup	43	2.23874	0	0	0	0	0	20.7	103.9
Ta oak 2	T21	Taastrup	43	2.55351	0.0097753	0	0.0114508	0.0399246	0	22.1	136.5
Ta oak 2	T22	Taastrup	43	2.42585	0.00943844	0	0.00923332	0.0285261	0	23.4	558.6
Ta oak 2	T23	Taastrup	43	4.26042	0.0118821	0	0.0117804	0.0427935	0.0309027	24.6	349.9
Ta oak 2	T24	Taastrup	43	0.696608	0.0222719	0.0348738	0.0164648	0.0674759	0.0460807	24.1	421.9
Ta oak 2	T25	Taastrup	43	6.84567	0.0234539	0	0.0197121	0.070092	0	25.3	1083.4
Ta oak 2	T26	Taastrup	43	6.502	0.0215429	0	0.0160053	0.058087	0	26.1	290
Ta oak 2	T27	Taastrup	43	5.0625	0.0149561	0	0.0127559	0.0460587	0.0132142	26.9	42.9
Ta oak 2	T28	Taastrup	43	3.43074	0.0252683	0.0428121	0.0206006	0.0580217	0	24.3	56.4
Ta oak 2	T29	Taastrup	43	2.82942	0.0271243	0	0.0179184	0.051249	0.0260813	26.7	1480

## Sheet: Beech
tree nr	ID	Geographical location	Age	α-Thujene	α-Pinene	Camphene	Sabinene	α-Phellandrene	3-Carene	α-Terpinene	Limonene	β-Phellandrene	γ-Terpinene	Terpinolene	Temperature (°C)	PAR (µmol m¯² s¯¹)
Lj tree 1	L11	Ljubljana	45	0.078814	0.126503	0	0.556423	0	0.230818	0.0866731	0.239134	0.10708	0	0	19.7	546
Lj tree 1	L12	Ljubljana	45	0.0896775	0.126594	0	0.687828	0	0.225293	0.119769	0.220277	0	0.204585	0	19.6	449
Lj tree 1	L13	Ljubljana	45	0.0661003	0.0718537	0	0.419463	0	0.137085	0.0796769	0.150321	0	0.150493	0	19.9	584
Lj tree 1	L14	Ljubljana	45	0.055933	0.136328	0	0.362983	0	0.148121	0.0588209	0.171505	0.0619395	0	0	15.6	302
Lj tree 1	L15	Ljubljana	45	0.0494335	0.0670454	0	0.15794	0	0.125739	0	0.13007	0	0	0	16.9	492
Lj tree 1	L16	Ljubljana	45	0.0541007	0.0402088	0	0.134896	0	0.0711637	0.0462789	0.0765743	0	0.0788394	0	17.8	698
Lj tree 1	L17	Ljubljana	45	0.0321577	0.057212	0	0.102385	0	0.0572805	0.043712	0.0344211	0	0.0642336	0	17.4	668
Gr tree 1	G11	Grafrath	51	0	0	0	0	0	0.0773287	0	0.0876557	0	0	0	16.7	641
Gr tree 1	G12	Grafrath	51	0	0.0558916	0	0	0	0.0892212	0	0.0861144	0	0	0	18.2	978
Gr tree 1	G13	Grafrath	51	0.0416646	0.0421457	0	0.17946	0	0.0653074	0.04888	0.0757831	0.0464376	0.07621	0	18.6	939
Gr tree 1	G14	Grafrath	51	0.102729	0.124786	0	0.241909	0	0.174707	0.081974	0.169562	0.107535	0.177427	0	18.7	765
Gr tree 1	G15	Grafrath	51	0.0493581	0.122891	0	0.108815	0	0.148354	0	0.14074	0.0587462	0.110125	0	15.935	881
Gr tree 1	G16	Grafrath	51	0.093173	0.305808	0	0.246238	0	0.140149	0.0956204	0.111118	0.0983679	0.206266	0	17.284	854
Gr tree 1	G17	Grafrath	51	0.101434	0.100755	0	0.251272	0	0.11784	0.103333	0.127344	0.0892785	0.205661	0	21.253	865
Gr tree 1	G18	Grafrath	51	0.0643589	0.0848882	0.0752365	0.452238	0	0.104776	0.0706472	0.126067	0.0510567	0.150155	0	28.141	740
Gr tree 1	G19	Grafrath	51	0.179819	0.0604026	0	0.765137	0.0393107	0.0756526	0.138449	0.117264	0.111251	0.294111	0.126719	29.903	865
Gr tree 1	G110	Grafrath	51	0.258214	0.0689352	0	0.877945	0.0648185	0.0798139	0.209131	0.126508	0.16848	0.42076	0.0761513	31.936	894
Gr tree 1	G111	Grafrath	51	0.252035	0.072242	0	0.878138	0.072631	0.0887548	0.211923	0.145099	0.159923	0.439859	0	32.414	839
Gr tree 1	G112	Grafrath	51	0.154769	0.0712988	0	0.924718	0	0.0962172	0.123573	0.137961	0.0929458	0.265874	0.115803	20.283	703
Gr tree 1	G113	Grafrath	51	0.157044	0.0873401	0	0.873842	0	0.0910975	0.144909	0.143102	0.106357	0.279661	0.119784	24.816	837
Gr tree 1	G114	Grafrath	51	0.372934	0.112357	0	1.06534	0.0787658	0.0955197	0.271677	0.162503	0.201738	0.601356	0.192559	23.31	732
Gr tree 1	G115	Grafrath	51	0.209891	0.0701592	0	0.635285	0.0551598	0.0695599	0.165312	0.101814	0.148432	0.352335	0.12576	25.461	655
Gr tree 2	G21	Grafrath	51	0	0.120017	0	0.155543	0	0.187956	0	0.181219	0	0	0	22.634	791
Gr tree 2	G22	Grafrath	51	0.126278	0.0729503	0	0.31066	0	0.115505	0.0977847	0.127027	0.0991118	0.218558	0	25.024	724
Gr tree 2	G23	Grafrath	51	0.12378	0.128085	0.124268	0.176854	0.0542562	0.160307	0.141146	0.171555	0.15159	0.237998	0	16.37	730
Gr tree 2	G24	Grafrath	51	0.0579405	0.0844988	0	0.132439	0	0.111169	0.0713473	0.109013	0.0737923	0.131303	0	19.567	619
Gr tree 2	G25	Grafrath	51	0	0.13847	0.162973	0.131192	0	0.200632	0	0.209667	0	0	0	22.929	518
Gr tree 2	G26	Grafrath	51	0.0533834	0.431365	0.169577	0.538597	0	0.28559	0	0.251675	0.179043	0	0	32.7	886
Gr tree 2	G27	Grafrath	51	0.101816	0.172891	0	0.583471	0	0.203498	0.0829648	0.243434	0.0971393	0	0	33.62	919
Gr tree 2	G28	Grafrath	51	0.0610675	0.0916723	0.0908411	0.345005	0	0.13701	0.0823163	0.173038	0.0927767	0.173953	0	35.49	902
Gr tree 2	G29	Grafrath	51	0.0624709	0.0867712	0	0.349952	0	0.0944107	0.0609411	0.11836	0.0638214	0.148037	0	27.581	771
Gr tree 2	G210	Grafrath	51	0.16523	0.0985674	0	0.62162	0.0547644	0.0882806	0.136367	0.114385	0.116351	0.27937	0.117245	27.282	901
Gr tree 2	G211	Grafrath	51	0.0299496	0.0714103	0	0.184525	0	0.0886176	0	0.0928089	0.047186	0	0	29.901	903
Gr tree 2	G212	Grafrath	51	0	0.0689259	0	0	0	0.093304	0	0.134964	0	0	0	17.344	699
Gr tree 2	G213	Grafrath	51	0	0.0604113	0	0.215131	0	0.100946	0	0.111027	0	0	0	20.974	807
Gr tree 2	G214	Grafrath	51	0.0722502	0.0594724	0	0.272917	0	0.0890674	0.0708409	0.114803	0.0582295	0.169921	0	20.779	573
Gr tree 2	G215	Grafrath	51	0.13952	0.0774635	0	0.729313	0	0.079244	0.123102	0.107941	0.0985312	0.228476	0.118166	22.123	514
Gr tree 2	G216	Grafrath	51	0.187983	0.0937966	0	0.549436	0.0567602	0.078738	0.16067	0.0986874	0.135891	0.290808	0	20.822	1045
Gr tree 2	G217	Grafrath	51	0.279296	0.0901504	0	0.823083	0.0719893	0.0625247	0.20029	0.123081	0.184829	0.36865	0	20.04	721
Ta tree 1	T11	Taastrup	43	0	0.0365062	0.0589173	0	0	0.0265624	0	0.10928	0	0	0	21.2	113.6
Ta tree 1	T12	Taastrup	43	0	0.0373412	0.0438637	0	0	0.0205922	0	0.112737	0	0	0	21.3	166.5
Ta tree 1	T13	Taastrup	43	0	0.016867	0.0936595	0.0179561	0	0.0301149	0	0.12489	0	0	0	22.1	185.5
Ta tree 1	T14	Taastrup	43	0	0.0705485	0.0848252	0	0	0.0377689	0	0.140846	0	0	0	22.4	168.3
Ta tree 1	T15	Taastrup	43	0	0.0303223	0	0.362213	0	0.0348267	0	0.134322	0	0	0	23.2	115.8
Ta tree 1	T16	Taastrup	43	0	0.0226399	0	0.433309	0	0.0235533	0	0.094452	0	0	0	23.9	406.7
Ta tree 1	T17	Taastrup	43	0	0.0214521	0	0.209255	0	0.0252312	0	0.0890829	0	0	0	24.4	194.4
Ta tree 1	T18	Taastrup	43	0	0.0386727	0	0.330292	0	0.0438555	0	0.121849	0	0	0	24.8	163.1
Ta tree 1	T19	Taastrup	43	0	0.0435695	0	0.249425	0	0.0350832	0	0.119783	0	0	0	26.1	68.7
Ta tree 1	T110	Taastrup	43	0	0.0359669	0.0400864	0.528663	0	0.0272897	0	0.120068	0	0	0	27.1	320.3
