# Supplementary material for: BVOC emissions from English oak ( Quercus robur ) and European beech ( Fagus sylvatica ) along a latitudinalgradient
Source: Copernicus journal article supplement (doi:10.5194/bg-13-6067-2016), 2016-11-04
Supplement: Supplementary file [file bg-13-6067-2016-supplement-title-page.pdf › bg-13-6067-2016-supplement-title-page.pdf]

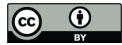

## *Supplement of*

# **BVOC emissions from English oak (*Quercus robur*) and European beech (*Fagus sylvatica*) along a latitudinal gradient**

**Ylva van Meeningen et al.**

*Correspondence to:* Ylva van Meeningen (ylva.van\_meeningen@nateko.lu.se)

- bg-13-6067-2016-supplement-title-page.pdf
- Supplement\_data
  - Figure\_2.xlsx
  - Figure\_3\_4.xlsx
  - Figure\_5\_6.xlsx
  - Figure\_7\_8.xlsx

The copyright of individual parts of the supplement might differ from the CC-BY 3.0 licence.
